# Supplementary material for: Eddy flux measurements of sulfur dioxide deposition to the sea surface
Source: Copernicus journal article supplement (doi:10.5194/acp-18-15291-2018), 2018-10-24
Supplement: Supplementary file 1 [file acp-18-15291-2018-supplement.zip]

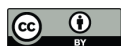

## *Supplement of*

# **Eddy flux measurements of sulfur dioxide deposition to the sea surface**

**Jack G. Porter et al.**

*Correspondence to:* Jack G. Porter ([jgporter@uci.edu](mailto:jgporter@uci.edu))

- [acp-18-15291-2018-supplement-title-page.pdf](#)
- [Porter et al\\_ACP\\_Supplement\\_data.csv](#)
- [Porter et al\\_ACP\\_Supplement\\_readme.txt](#)

The copyright of individual parts of the supplement might differ from the CC BY 4.0 License.
